# Supplementary material for: Improving respiratory muscle strength in patients with multiple sclerosis through respiratory muscle training: a systematic review and meta-analysis
Source: PeerJ journal article supplement (doi:10.7717/peerj.20876), 2026-04-09
Supplement: search_history.pdf [file search_history.pdf]

| Entitlements                                                         | # | Search Query                                                                                                                                                                                                                                                             | Database                       | Results | Date Run                                   |
|----------------------------------------------------------------------|---|--------------------------------------------------------------------------------------------------------------------------------------------------------------------------------------------------------------------------------------------------------------------------|--------------------------------|---------|--------------------------------------------|
| - WOS.IC: 1993 to 2024- WOS.CCR: 1985 to 2024- WOS.SCI: 2013 to 2024 | 1 | ALL=(Multiple Sclerosis)                                                                                                                                                                                                                                                 | Web of Science Core Collection | 94365   | Mon Mar 18 2024 21:59:05 GMT+0800 (中国标准时间) |
| - WOS.IC: 1993 to 2024- WOS.CCR: 1985 to 2024- WOS.SCI: 2013 to 2024 | 2 | ALL=(Sclerosis, Multiple OR Sclerosis, Disseminated OR Disseminated Sclerosis OR MS (Multiple Sclerosis) OR Multiple Sclerosis, Acute Fulminating)                                                                                                                       | Web of Science Core Collection | 94446   | Mon Mar 18 2024 21:59:29 GMT+0800 (中国标准时间) |
| - WOS.IC: 1993 to 2024- WOS.CCR: 1985 to 2024- WOS.SCI: 2013 to 2024 | 3 | (ALL=(Sclerosis, Multiple OR Sclerosis, Disseminated OR Disseminated Sclerosis OR MS (Multiple Sclerosis) OR Multiple Sclerosis, Acute Fulminating)) AND ALL=(Multiple Sclerosis)                                                                                        | Web of Science Core Collection | 94365   | Mon Mar 18 2024 21:59:43 GMT+0800 (中国标准时间) |
| - WOS.IC: 1993 to 2024- WOS.CCR: 1985 to 2024- WOS.SCI: 2013 to 2024 | 4 | ALL=(Breathing Exercises)                                                                                                                                                                                                                                                | Web of Science Core Collection | 4476    | Mon Mar 18 2024 22:00:07 GMT+0800 (中国标准时间) |
| - WOS.IC: 1993 to 2024- WOS.CCR: 1985 to 2024- WOS.SCI: 2013 to 2024 | 5 | ALL=(Exercise, Breathing OR Respiratory Muscle Training OR Muscle Training, Respiratory OR Training, Respiratory Muscle)                                                                                                                                                 | Web of Science Core Collection | 7576    | Mon Mar 18 2024 22:00:30 GMT+0800 (中国标准时间) |
| - WOS.IC: 1993 to 2024- WOS.CCR: 1985 to 2024- WOS.SCI: 2013 to 2024 | 6 | (ALL=(Exercise, Breathing OR Respiratory Muscle Training OR Muscle Training, Respiratory OR Training, Respiratory Muscle)) AND ALL=(Breathing Exercises)                                                                                                                 | Web of Science Core Collection | 4470    | Mon Mar 18 2024 22:00:43 GMT+0800 (中国标准时间) |
| - WOS.IC: 1993 to 2024- WOS.CCR: 1985 to 2024- WOS.SCI: 2013 to 2024 | 7 | ((ALL=(Exercise, Breathing OR Respiratory Muscle Training OR Muscle Training, Respiratory OR Training, Respiratory Muscle)) AND ALL=(Breathing Exercises)) AND ALL=(Sclerosis, Multiple OR Sclerosis, Disseminated OR Disseminated Sclerosis OR MS (Multiple Sclerosis)) | Web of Science Core Collection | 41      | Mon Mar 18 2024 22:01:32 GMT+0800 (中国标准时间) |

Search number Query

Sort By Filters

Search Details

Results Time

((Multiple Sclerosis) OR (Sclerosis, Multiple OR Sclerosis, Disseminated OR Disseminated Sclerosis OR MS (Multiple Sclerosis) OR Multiple Sclerosis, 8 Acute Fulminating)) AND ((Breathing Exercises) OR (Exercise, Breathing OR Respiratory Muscle Training OR Muscle Training, Respiratory OR Training, Respiratory Muscle))

Randomized Controlled Trial

((("multiple sclerosis"[MeSH Terms] OR ("multiple"[All Fields] AND "sclerosis"[All Fields])) OR "multiple sclerosis"[All Fields] OR (((("multiple sclerosis"[MeSH Terms] OR ("multiple"[All Fields] AND "sclerosis"[All Fields]) OR "multiple sclerosis"[All Fields] OR ("sclerosis"[All Fields] AND "multiple"[All Fields]) OR "sclerosis multiple"[All Fields] OR ("multiple sclerosis"[MeSH Terms] OR ("multiple"[All Fields] AND "sclerosis"[All Fields]) OR "multiple sclerosis"[All Fields] OR ("sclerosis"[All Fields] AND "disseminated"[All Fields]) OR "sclerosis disseminated"[All Fields]) OR ("multiple sclerosis"[MeSH Terms] OR ("multiple"[All Fields] AND "sclerosis"[All Fields]) OR "multiple sclerosis"[All Fields] OR ("disseminated"[All Fields] AND "sclerosis"[All Fields]) OR "disseminated sclerosis"[All Fields]) OR ("ms"[Journal] OR "ms"[Journal] OR "med sci paris"[Journal] OR "ms"[All Fields])) AND ("multiple sclerosis"[MeSH Terms] OR ("multiple"[All Fields] AND "sclerosis"[All Fields]) OR "multiple sclerosis"[All Fields])) OR ("multiple sclerosis"[MeSH Terms] OR ("multiple"[All Fields] AND "sclerosis"[All Fields]) OR "multiple sclerosis"[All Fields] OR ("multiple"[All Fields] AND "sclerosis"[All Fields]) OR "multiple sclerosis acute fulminating"[All Fields])) AND ("breathing exercises"[MeSH Terms] OR ("breathing"[All Fields] AND "exercises"[All Fields]) OR "breathing exercises"[All Fields] OR ("breathing exercises"[MeSH Terms] OR ("breathing"[All Fields] AND "exercises"[All Fields]) OR "breathing exercises"[All Fields] OR ("exercise"[All Fields] AND "breathing"[All Fields]) OR "exercise breathing"[All Fields] OR ("breathing exercises"[MeSH Terms] OR ("breathing"[All Fields] AND "exercises"[All Fields]) OR "breathing exercises"[All Fields] OR ("respiratory"[All Fields] AND "muscle"[All Fields] AND "training"[All Fields]) OR "respiratory muscle training"[All Fields]) OR ("breathing exercises"[MeSH Terms] OR ("breathing"[All Fields] AND "exercises"[All Fields]) OR "breathing exercises"[All Fields] OR ("muscle"[All Fields] AND "training"[All Fields] AND "respiratory"[All Fields]) OR "muscle training respiratory"[All Fields]) OR ("breathing exercises"[MeSH Terms] OR ("breathing"[All Fields] AND "exercises"[All Fields]) OR "breathing exercises"[All Fields] OR ("training"[All Fields] AND "respiratory"[All Fields] AND "muscle"[All Fields]) OR "training respiratory muscle"[All Fields])))) AND (randomizedcontrolledtrial[Filter]))

19 8:32:17

((Multiple Sclerosis) OR (Sclerosis, Multiple OR Sclerosis, Disseminated OR Disseminated Sclerosis OR MS (Multiple Sclerosis) OR Multiple Sclerosis, 7 Acute Fulminating)) AND ((Breathing Exercises) OR (Exercise, Breathing OR Respiratory Muscle Training OR Muscle Training, Respiratory OR Training, Respiratory Muscle))

((("multiple sclerosis"[MeSH Terms] OR ("multiple"[All Fields] AND "sclerosis"[All Fields])) OR "multiple sclerosis"[All Fields] OR (((("multiple sclerosis"[MeSH Terms] OR ("multiple"[All Fields] AND "sclerosis"[All Fields]) OR "multiple sclerosis"[All Fields] OR ("sclerosis"[All Fields] AND "multiple"[All Fields]) OR "sclerosis multiple"[All Fields] OR ("multiple sclerosis"[MeSH Terms] OR ("multiple"[All Fields] AND "sclerosis"[All Fields]) OR "multiple sclerosis"[All Fields] OR ("sclerosis"[All Fields] AND "disseminated"[All Fields]) OR "sclerosis disseminated"[All Fields]) OR ("multiple sclerosis"[MeSH Terms] OR ("multiple"[All Fields] AND "sclerosis"[All Fields]) OR "multiple sclerosis"[All Fields] OR ("disseminated"[All Fields] AND "sclerosis"[All Fields]) OR "disseminated sclerosis"[All Fields]) OR ("ms"[Journal] OR "ms"[Journal] OR "med sci paris"[Journal] OR "ms"[All Fields])) AND ("multiple sclerosis"[MeSH Terms] OR ("multiple"[All Fields] AND "sclerosis"[All Fields]) OR "multiple sclerosis"[All Fields])) OR ("multiple sclerosis"[MeSH Terms] OR ("multiple"[All Fields] AND "sclerosis"[All Fields]) OR "multiple sclerosis"[All Fields] OR ("multiple"[All Fields] AND "sclerosis"[All Fields]) OR "multiple sclerosis acute fulminating"[All Fields])) AND ("breathing exercises"[MeSH Terms] OR ("breathing"[All Fields] AND "exercises"[All Fields]) OR "breathing exercises"[All Fields] OR ("breathing exercises"[MeSH Terms] OR ("breathing"[All Fields] AND "exercises"[All Fields] OR "exercise breathing"[All Fields] OR ("breathing exercises"[MeSH Terms] OR ("breathing"[All Fields] AND "exercises"[All Fields]) OR "breathing exercises"[All Fields] OR ("respiratory"[All Fields] AND "muscle"[All Fields] AND "training"[All Fields]) OR "respiratory muscle training"[All Fields]) OR ("breathing exercises"[MeSH Terms] OR ("breathing"[All Fields] AND "exercises"[All Fields]) OR "breathing exercises"[All Fields] OR ("muscle"[All Fields] AND "training"[All Fields] AND "respiratory"[All Fields]) OR "muscle training respiratory"[All Fields]) OR ("breathing exercises"[MeSH Terms] OR ("breathing"[All Fields] AND "exercises"[All Fields]) OR "breathing exercises"[All Fields] OR ("training"[All Fields] AND "respiratory"[All Fields] AND "muscle"[All Fields]) OR "training respiratory muscle"[All Fields]))))

84 8:32:10

|                                                                                                                                                                          |                                                                                                                                                                                                                                                                                                                                                                                                                                                                                                                                                                                                                                                                                                                                                                                                                                                                                                                                                                                                                                                                                                                                                                                                                                                                                                                                                                                 |         |         |
|--------------------------------------------------------------------------------------------------------------------------------------------------------------------------|---------------------------------------------------------------------------------------------------------------------------------------------------------------------------------------------------------------------------------------------------------------------------------------------------------------------------------------------------------------------------------------------------------------------------------------------------------------------------------------------------------------------------------------------------------------------------------------------------------------------------------------------------------------------------------------------------------------------------------------------------------------------------------------------------------------------------------------------------------------------------------------------------------------------------------------------------------------------------------------------------------------------------------------------------------------------------------------------------------------------------------------------------------------------------------------------------------------------------------------------------------------------------------------------------------------------------------------------------------------------------------|---------|---------|
| 6 (Breathing Exercises) OR (Exercise, Breathing OR Respiratory Muscle Training OR Muscle Training)                                                                       | <p>"breathing exercises"[MeSH Terms] OR ("breathing"[All Fields] AND "exercises"[All Fields]) OR "breathing exercises"[All Fields] OR ("breathing exercises"[MeSH Terms] OR ("breathing"[All Fields] AND "exercises"[All Fields]) OR "breathing exercises"[All Fields] OR ("exercise"[All Fields] AND "breathing"[All Fields]) OR "exercise breathing"[All Fields] OR ("breathing exercises"[MeSH Terms] OR ("breathing"[All Fields] AND "exercises"[All Fields]) OR "breathing exercises"[All Fields] OR ("respiratory"[All Fields] AND "muscle"[All Fields] AND "training"[All Fields]) OR "respiratory muscle training"[All Fields]) OR ("breathing exercises"[MeSH Terms] OR ("breathing"[All Fields] AND "exercises"[All Fields]) OR "breathing exercises"[All Fields] OR ("muscle"[All Fields] AND "training"[All Fields] AND "respiratory"[All Fields]) OR "muscle training respiratory"[All Fields]) OR ("breathing exercises"[MeSH Terms] OR ("breathing"[All Fields] AND "exercises"[All Fields]) OR "breathing exercises"[All Fields] OR ("training"[All Fields] AND "respiratory"[All Fields] AND "muscle"[All Fields]) OR "training respiratory muscle"[All Fields]))</p>                                                                                                                                                                                          | 14,432  | 8:22:55 |
| 5 Exercise, Breathing OR Respiratory Muscle Training OR Muscle Training, Respiratory OR Training, Respiratory Muscle                                                     | <p>"breathing exercises"[MeSH Terms] OR ("breathing"[All Fields] AND "exercises"[All Fields]) OR "breathing exercises"[All Fields] OR ("exercise"[All Fields] AND "breathing"[All Fields]) OR "exercise breathing"[All Fields] OR ("breathing exercises"[MeSH Terms] OR ("breathing"[All Fields] AND "exercises"[All Fields]) OR "breathing exercises"[All Fields] OR ("respiratory"[All Fields] AND "muscle"[All Fields] AND "training"[All Fields]) OR "respiratory muscle training"[All Fields]) OR ("breathing exercises"[MeSH Terms] OR ("breathing"[All Fields] AND "exercises"[All Fields]) OR "breathing exercises"[All Fields] OR ("muscle"[All Fields] AND "training"[All Fields] AND "respiratory"[All Fields]) OR "muscle training respiratory"[All Fields]) OR ("breathing exercises"[MeSH Terms] OR ("breathing"[All Fields] AND "exercises"[All Fields]) OR "breathing exercises"[All Fields] OR ("training"[All Fields] AND "respiratory"[All Fields] AND "muscle"[All Fields]) OR "training respiratory muscle"[All Fields]))</p>                                                                                                                                                                                                                                                                                                                              | 14,432  | 8:22:42 |
| 4 Breathing Exercises                                                                                                                                                    | <p>"breathing exercises"[MeSH Terms] OR ("breathing"[All Fields] AND "exercises"[All Fields]) OR "breathing exercises"[All Fields]</p>                                                                                                                                                                                                                                                                                                                                                                                                                                                                                                                                                                                                                                                                                                                                                                                                                                                                                                                                                                                                                                                                                                                                                                                                                                          | 5,798   | 8:22:22 |
| 3 (Multiple Sclerosis) OR (Sclerosis, Multiple OR Sclerosis, Disseminated OR Disseminated Sclerosis OR MS (Multiple Sclerosis) OR Multiple Sclerosis, Acute Fulminating) | <p>"multiple sclerosis"[MeSH Terms] OR ("multiple"[All Fields] AND "sclerosis"[All Fields]) OR "multiple sclerosis"[All Fields] OR (((("multiple sclerosis"[MeSH Terms] OR ("multiple"[All Fields] AND "sclerosis"[All Fields]) OR "multiple sclerosis"[All Fields] OR ("sclerosis"[All Fields] AND "multiple"[All Fields]) OR "sclerosis multiple"[All Fields] OR ("multiple sclerosis"[MeSH Terms] OR ("multiple"[All Fields] AND "sclerosis"[All Fields]) OR "multiple sclerosis"[All Fields] OR ("sclerosis"[All Fields] AND "disseminated"[All Fields]) OR "sclerosis disseminated"[All Fields]) OR ("multiple sclerosis"[MeSH Terms] OR ("multiple"[All Fields] AND "sclerosis"[All Fields]) OR "multiple sclerosis"[All Fields] OR ("disseminated"[All Fields] AND "sclerosis"[All Fields]) OR "disseminated sclerosis"[All Fields]) OR ("ms"[Journal] OR "ms"[Journal] OR "med sci paris"[Journal] OR "ms"[All Fields])) AND ("multiple sclerosis"[MeSH Terms] OR ("multiple"[All Fields] AND "sclerosis"[All Fields]) OR "multiple sclerosis"[All Fields])) OR ("multiple sclerosis"[MeSH Terms] OR ("multiple"[All Fields] AND "sclerosis"[All Fields]) OR "multiple sclerosis"[All Fields] OR ("multiple"[All Fields] AND "sclerosis"[All Fields] AND "acute"[All Fields] AND "fulminating"[All Fields]) OR "multiple sclerosis acute fulminating"[All Fields]))</p> | 112,203 | 8:19:28 |
| 2 Sclerosis, Multiple OR Sclerosis, Disseminated OR Disseminated Sclerosis OR MS (Multiple Sclerosis)                                                                    | <p>"multiple sclerosis"[MeSH Terms] OR ("multiple"[All Fields] AND "sclerosis"[All Fields]) OR "multiple sclerosis"[All Fields] OR ("sclerosis"[All Fields] AND "multiple"[All Fields]) OR "sclerosis multiple"[All Fields] OR ("multiple sclerosis"[MeSH Terms] OR ("multiple"[All Fields] AND "sclerosis"[All Fields]) OR "multiple sclerosis"[All Fields] OR ("sclerosis"[All Fields] AND "disseminated"[All Fields]) OR "sclerosis disseminated"[All Fields]) OR ("multiple sclerosis"[MeSH Terms] OR ("multiple"[All Fields] AND "sclerosis"[All Fields] AND "disseminated"[All Fields]) OR "multiple sclerosis"[All Fields] OR ("disseminated"[All Fields] AND "sclerosis"[All Fields]) OR "disseminated sclerosis"[All Fields]) OR ("multiple sclerosis"[MeSH Terms] OR ("multiple"[All Fields] AND "sclerosis"[All Fields]) OR "multiple sclerosis"[All Fields] OR ("ms"[All Fields] AND "multiple"[All Fields] AND "sclerosis"[All Fields]) OR "ms multiple sclerosis"[All Fields]) OR ("multiple sclerosis"[MeSH Terms] OR ("multiple"[All Fields] AND "sclerosis"[All Fields]) OR "multiple sclerosis"[All Fields] OR ("multiple"[All Fields] AND "sclerosis"[All Fields] AND "acute"[All Fields] AND "fulminating"[All Fields]) OR "multiple sclerosis acute fulminating"[All Fields]))</p>                                                                         | 112,460 | 8:19:10 |
| 1 Multiple Sclerosis                                                                                                                                                     | <p>"multiple sclerosis"[MeSH Terms] OR ("multiple"[All Fields] AND "sclerosis"[All Fields]) OR "multiple sclerosis"[All Fields]</p>                                                                                                                                                                                                                                                                                                                                                                                                                                                                                                                                                                                                                                                                                                                                                                                                                                                                                                                                                                                                                                                                                                                                                                                                                                             | 112,203 | 8:18:58 |

Search Name:

Date Run: 20/03/2024 15:01:21

Comment:

ID Search Hits

#1 MeSH descriptor: [Multiple Sclerosis] explode all trees 5178

#2 MeSH descriptor: [Breathing Exercises] explode all trees 1336

#3 ((Exercise, Breathing) OR (Respiratory Muscle Training) OR (Muscle Training, Respiratory) OR (Training, Respiratory Muscle)):ti,ab,kw (Word variations have been searched) 10566

#4 ((Sclerosis, Multiple) OR (Sclerosis, Disseminated) OR (Disseminated Sclerosis) OR (MS (Multiple Sclerosis)) OR (Multiple Sclerosis, Acute Fulminating)):ti,ab,kw (Word variations have been searched) 12930

#5 #1 or #4 12930

#6 #2 or #3 10696

#7 #5 and #6 114

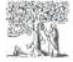

### Embase session results (22 Mar 2024)

| No. | Query                                                                                                                             | Results |
|-----|-----------------------------------------------------------------------------------------------------------------------------------|---------|
| #10 | #6 AND #8 AND [randomized controlled trial]/lim                                                                                   | 188     |
| #9  | #6 AND #8                                                                                                                         | 892     |
| #8  | #1 OR #7                                                                                                                          | 189301  |
| #7  | 'sclerosis, multiple' OR 'sclerosis, disseminated' OR 'disseminated sclerosis' OR 'multiple sclerosis, acute fulminating'         | 1078    |
| #6  | #4 OR #5                                                                                                                          | 97846   |
| #5  | 'muscle training' OR 'muscle training, respiratory' OR 'training, respiratory muscle'                                             | 97497   |
| #4  | 'respiratory training'                                                                                                            | 537     |
| #3  | #1 OR #2                                                                                                                          | 816212  |
| #2  | 'sclerosis, multiple' OR 'sclerosis, disseminated' OR 'disseminated sclerosis' OR 'ms' OR 'multiple sclerosis, acute fulminating' | 726631  |
| #1  | 'multiple sclerosis'                                                                                                              | 189188  |

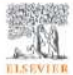

Embase Search Emtree Journals Results My tools 14 [Sign in](#)

#6 AND #8 AND [2024-2026]py

Search > Mapping Date Sources Fields Quick limits EBM Pub. types Languages Gender Age Animal Search tips

Results Filters **History** Save | Delete | Print view | Export | Email **Combine** > using  And  Or ^ Collapse

- #10 #6 AND #8 AND [2024-2026]py 0
- #9 #6 AND #8 7
- #8 #1 OR #7 212,280
- #7 'sclerosis, multiple' OR 'sclerosis, disseminated' OR 'disseminated sclerosis' OR 'multiple sclerosis, acute fulminating' 1,167
- #6 #4 AND #5 158
- #5 'muscle training' OR 'muscle training, respiratory' OR 'training, respiratory muscle' 25,940
- #4 'respiratory training' 766
- #3 #1 AND #2 113,451
- #2 'sclerosis, multiple' OR 'sclerosis, disseminated' OR 'disseminated sclerosis' OR 'ms' OR 'multiple sclerosis, acute fulminating' 821,226
- #1 'multiple sclerosis'exp OR 'multiple sclerosis' 212,165

0 results for search #10 Set email alert Search details Set RSS feed Index miner

View | Export | Email | Add to Temporary list

| Search Query                                                                                                                                                                                                                                                                                                                 | Sort By | Filters                                | Search Details                                                                                                                                                                                                                                                                                                                                                                                                                                                                                                                                                                                                                                                                                                                                                                                                                                                                                                                                                                                                                                                                                                                                                                                                                                                                                                                                                                                                                                                                                                                                                                                                                                                                                                                                                                                                                                                                                                                                                                                                                                                                                                                                 | Results | Time    | Date     |
|------------------------------------------------------------------------------------------------------------------------------------------------------------------------------------------------------------------------------------------------------------------------------------------------------------------------------|---------|----------------------------------------|------------------------------------------------------------------------------------------------------------------------------------------------------------------------------------------------------------------------------------------------------------------------------------------------------------------------------------------------------------------------------------------------------------------------------------------------------------------------------------------------------------------------------------------------------------------------------------------------------------------------------------------------------------------------------------------------------------------------------------------------------------------------------------------------------------------------------------------------------------------------------------------------------------------------------------------------------------------------------------------------------------------------------------------------------------------------------------------------------------------------------------------------------------------------------------------------------------------------------------------------------------------------------------------------------------------------------------------------------------------------------------------------------------------------------------------------------------------------------------------------------------------------------------------------------------------------------------------------------------------------------------------------------------------------------------------------------------------------------------------------------------------------------------------------------------------------------------------------------------------------------------------------------------------------------------------------------------------------------------------------------------------------------------------------------------------------------------------------------------------------------------------------|---------|---------|----------|
| ((Exercise, Breathing OR Respiratory Muscle Training OR Muscle Training, Respiratory OR Training, Respiratory Muscle) AND (Breathing Exercises)) AND (Sclerosis, Multiple OR Sclerosis, Disseminated OR Disseminated Sclerosis OR MS (Multiple Sclerosis) OR Multiple Sclerosis, Acute Fulminating) AND (Multiple Sclerosis) |         | Must Recent from 2024/3/1 - 3000/12/12 | ((("breathing exercises"[MeSH Terms] OR ("breathing"[All Fields] AND "exercises"[All Fields]) OR "breathing exercises"[All Fields] OR "exercise"[All Fields] AND "breathing"[All Fields]) OR "exercise breathing"[All Fields] OR ("breathing exercises"[MeSH Terms] OR ("breathing"[All Fields] AND "exercises"[All Fields]) OR "breathing exercises"[All Fields] OR "respiratory"[All Fields] AND "muscle"[All Fields] AND "training"[All Fields]) OR "respiratory muscle training"[All Fields]) OR ("breathing exercises"[MeSH Terms] OR ("breathing"[All Fields] AND "exercises"[All Fields]) OR "breathing exercises"[All Fields] OR "muscle training respiratory"[All Fields] OR ("breathing exercises"[MeSH Terms] OR ("breathing"[All Fields] AND "exercises"[All Fields]) OR "breathing exercises"[All Fields] OR "training"[All Fields] AND "respiratory"[All Fields] AND "muscle"[All Fields]) OR "training respiratory muscle"[All Fields]) AND ("breathing exercises"[MeSH Terms] OR ("breathing"[All Fields] AND "exercises"[All Fields]) OR "breathing exercises"[All Fields]) AND ((("multiple sclerosis"[MeSH Terms] OR "sclerosis, multiple"[All Fields] OR "multiple sclerosis"[MeSH Terms] OR "sclerosis"[All Fields] OR ("sclerosis"[All Fields] AND "multiple"[All Fields]) OR ("multiple"[All Fields] AND "sclerosis"[All Fields]) OR "multiple sclerosis"[All Fields] OR ("sclerosis"[All Fields] AND "disseminated"[All Fields]) OR "sclerosis disseminated"[All Fields] OR ("multiple sclerosis"[MeSH Terms] OR ("multiple"[All Fields] AND "sclerosis"[All Fields]) OR "multiple sclerosis"[All Fields] OR ("disseminated"[All Fields] AND "sclerosis"[All Fields]) OR "disseminated sclerosis"[All Fields]) OR "ms"[Journal] OR "ms sci pars"[Journal] OR "ms"[All Fields]) AND ("multiple sclerosis"[MeSH Terms] OR ("multiple"[All Fields] AND "sclerosis"[All Fields]) OR "multiple sclerosis"[All Fields]) OR ("multiple sclerosis"[All Fields] OR ("multiple"[All Fields] AND "sclerosis"[All Fields]) OR "multiple sclerosis"[All Fields] AND "acute"[All Fields] AND "fulminating"[All Fields]) OR "multiple | 11      | 1:53:17 | 2026/1/6 |

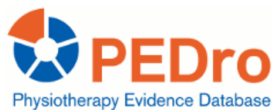

[Home](#) [Display Selected Records](#) [New Search \(Simple\)](#) [Continue Searching \(Advanced\)](#) [New Search \(Advanced\)](#) [Search Help](#)

## Search Results

Click on a title to view details of that record. If your search has returned many records you may need to move to the next page (at the top or bottom of the list of records). To display a list of records from one or a series of searches, click on *Select* and then *Display Selected Records*

Found 2 records

| Title                                                                                                                                                                                                          | Method         | Score (/10) | Select Record          |
|----------------------------------------------------------------------------------------------------------------------------------------------------------------------------------------------------------------|----------------|-------------|------------------------|
| <a href="#">Do proprioceptive neuromuscular facilitation techniques improve respiratory parameters and swallowing in people with multiple sclerosis: a randomized-controlled study [with consumer summary]</a> | clinical trial | 5/10        | <a href="#">Select</a> |
| <a href="#">Effect of expiratory muscle strength training on voice and speech: an exploratory study in persons with Parkinson's disease or multiple sclerosis</a>                                              | clinical trial | 5/10        | <a href="#">Select</a> |

# Web of Science Search Strategy (v0.1)

# Database: Web of Science Core Collection

# Entitlements:

- WOS. IC: 1993 to 2026
- WOS. CCR: 1985 to 2026
- WOS. SCI: 2013 to 2026

# Searches:

Search: (((Exercise, Breathing OR Respiratory Muscle Training OR Muscle Training, Respiratory OR Training, Respiratory Muscle) AND (Breathing Exercises)) AND (Sclerosis, Multiple OR Sclerosis, Disseminated OR Disseminated Sclerosis OR MS (Multiple Sclerosis) OR Multiple Sclerosis, Acute Fulminating)) AND (Multiple Sclerosis) (All Fields) and 2025 or 2024 (Publication Years)  
Date Run: Wed Jan 07 2026 01:17:04 GMT+0800 (中国标准时间) Results: 9

Search: (((Exercise, Breathing OR Respiratory Muscle Training OR Muscle Training, Respiratory OR Training, Respiratory Muscle) AND (Breathing Exercises)) AND (Sclerosis, Multiple OR Sclerosis, Disseminated OR Disseminated Sclerosis OR MS (Multiple Sclerosis) OR Multiple Sclerosis, Acute Fulminating)) AND (Multiple Sclerosis) (All Fields)  
Date Run: Wed Jan 07 2026 01:16:58 GMT+0800 (中国标准时间) Results: 50

**Filter your results**

**Date** ⓘ

**Publication date**

The last 3 months

The last 6 months

The last 9 months

The last year

The last 2 years

**Custom Range:**

📅 01/03/2024 to 📅 dd/mm/yyyy

[Apply](#) [Clear](#)

|                              |                         |              |                 |                          |                       |
|------------------------------|-------------------------|--------------|-----------------|--------------------------|-----------------------|
| <b>Cochrane Reviews</b><br>2 | Cochrane Protocols<br>0 | Trials<br>96 | Editorials<br>0 | Special Collections<br>0 | Clinical Answers<br>0 |
|------------------------------|-------------------------|--------------|-----------------|--------------------------|-----------------------|

**Date:** [Custom date range](#) ✕

**0** Cochrane Reviews matching **((Exercise, Breathing OR Respiratory Muscle Training OR Muscle Training, Respiratory OR Training, Respiratory Muscle) AND (Breathing Exercises)) AND (Sclerosis, Multiple OR Sclerosis, Disseminated OR Disseminated Sclerosis OR MS (Multiple Sclerosis) OR Multiple Sclerosis, Acute Fulminating)) AND (Multiple Sclerosis) in Title Abstract Keyword - (Word variations have been searched)**

Did you mean: [exerciser](#) | [exercise](#) | [exorcise](#)

Cochrane Database of Systematic Reviews  
Issue 1 of 12, January 2026

[Select all \(0\)](#)   [Export selected citation\(s\)](#)   [Show all previews](#)

Order by [Relevancy](#) ▼

Results per page [25](#) ▼
